# Supplementary material for: Paleoenvironment Variability during Termination I at the Reykjanes Ridge, North Atlantic
Source: Preprints.org preprint supplement (doi:10.20944/preprints201808.0102.v1), 2018-08-06
Supplement: Supplementary file 1 [file supplementary]

## Sheet: General data
cal age, years	d13C (per mil) G. bulloides	d13C (per mil) N. pachyderma sin.	d18O (permil) G. bulloides	d18O (permil) N. pachyderma sin.	Paleotemperature on PF_100m	Paleotemperature on R_100m	Mineral grains, tests per 1 g in fraction >100 µm	Total radiolarian abundances, tests per 1 g in fraction >50 µm	Total planktic foraminiferal abundances, tests per 1 g in fraction >100 µm	Total benthic foraminiferal abundances, tests per 1 g in fraction >100 µm
0	-0.33		1.66		9.5369	8,8987	240	4160	1700	28
197,1623932	-0.79				10.0345	8,0501	320	6100	4600	111
394,3247863	-0.33		1.48		11.2002	9,3398	450	7700	5100	102
542,1965812	-0.6		1.43		10.8482	10,561	810	8000	7100	228
739,3589744	-0.15		1.87		10.9807	10,0077	430	6460	3600	145
1035,102564	-0.31		1.54		11.3045	10,3828	1440	14360	5400	113
1281,555556	-0.21		2.01		10.6404	10,5228	1220	13300	7300	39
1873,042735	-0.03		1.86		9.4726	10,6628	140	12460	2800	33
2710,982906	-0.12		1.75		8.9210	10,7564	440	30150	5300	274
3401,051282	0.13		1.81		8.6821	10,8905	60	18200	5800	230
4436,153846	-0.21		1.73		9.5483	11,3079	130	400	10900	404
4978,350427	-0.36		1.3		9.5868	11,6325	250	570	8500	220
5767	-0.45		1.13		9.4338	11,4181	200	4400	12800	396
6961,285714	-0.49		1.49		9.9815	12,6458	420	6150	8100	292
8902	-0.62		1.42		8.5759	10,4155	30	4700	3200	234
9677,886076	-0.58		1.69		9.2445	10,6932	310	570	4300	90
10397	-0.63		2.17		10.2182	8,8673	680	7540	1700	55
11131,02083	-0.93		2.06		7.0519	8,9575	190	1220	1600	46
11331,20833					6.7038	10,0533	130	5000	650	42
11498,03125	-1.11		1.74		5.4542	8,3673	40	12320	1100	58
11631,48958	-0.92		2.31		7.1991	9,9901	190	2020	1200	96
11764,94792	-1.38	0.29	1.25	2,99	3.8295	9,8339	450	3200	3300	131
11898,40625	-1.17	-0.03	2.5	2,65	4.5989	9,1037	280	1070	420	54
12031,86458	-1.11	0.06	2.3	3,39	5.7837	7,2422	100	5950	460	66
12198,6875	-0.92	0.16	2.27	2,96	6.6607	8,8563	200	3140	600	29
12332,14583	-0.94	0.15	2.22	3,24	3.0941	3,8628	330	2290	920	19
12532,33333		0.39		3,41	3.0966	-1,0254	1740	1200	1800	23
12699,15625		0.36		3,27	3.0167	0,1691	830	430	950	16
12899,34375		0.28		3,3	2.6095	-0,3182	950	420	1800	38
13032,80208	-0.46	0.27	2.76	3,31	2.6211	-0,2228	2340	3870	2100	62
13266,35417					2.5690	0,1233	1750	1370	4400	66
13466,54167	-0.81	0.13	2.8	3,27	2.8317	1,6182	610	850	3700	144
13600	-0.88	0.28	2.48	3,52	2.9235	3,1654	270	4800	2200	55
13766,82292	-0.67		3.3		2.7846	3,0552	560	850	1900	42
13967,01042	-1.13	0.33	1.66	3,67	2.8431	6,2822	280	1030	1300	108
14100,46875	-0.77	0.17	2.99	3,56	2.7991	5,7861	270	390	2400	76
14300,65625	-0.68	0.18	3.01	4,14	3.1286	8,264	560	200	1700	74

## Sheet: 23 PF taxa in 37 samp
cal age, years	Globigerinella aequilateralis	Globigerina bulloides	Globigerina calida	Globigerinoides conglobatus	Globorotalia crassaformis	Sphaeroidinella dehiscens	Globigerina digitata	Globoquadrina dutertrei	Globigerina falconensis	Globigerinita glutinata	Globorotalia hirsuta	Globorotalia inflata	Pulleniatina obliquiloculata	Globoquadrina pachyderma sin.	Globoquadrina pachyderma dex.	Globigerina quinqueloba	Globigerinoides ruber	Globigerinoides tenellus + Globigerina rubescens	Globigerinoides sacculifer	Globorotalia menardii cultrata	Globorotalia scitula	Globorotalia truncatulinoides dex.	Orbulina universa
0	0	11,3	0	0	0	0	0	0	0	41,1	0,4	1,4	0	4,7	22,9	17,1	0	0	0	0	1,1	0	0
197,1623932	0	10,9	0	0	0	0	0	0	0	38	0,05	1,8	0	1,3	24,9	22,7	0	0	0	0	0,4	0	0
394,3247863	0	16,9	0	0	0	0	0	0	0	32,4	0	0,05	0	3,6	25,1	20,5	0	0	0	0	1,5	0	0
542,1965812	0	10,5	0	0	0	0	0	0	0	29,3	0,3	0,6	0	3,4	16	39	0	0	0	0	0,9	0	0,05
739,3589744	0	14,2	0	0	0	0	0	0	0	31	0,05	0,3	0	2,3	24,6	27	0	0	0	0	0,6	0	0,05
1035,102564	0	16,3	0	0	0	0	0	0	0	23,9	0,05	0,5	0	3	21,8	33	0	0	0	0	1,5	0	0
1281,555556	0	8,8	0	0	0	0	0	0	0	27,7	0	2,9	0	3,7	17,5	38,3	0	0	0	0	1,1	0,05	0,05
1873,042735	0	9,1	0	0	0	0	0	0	0	35,9	0,05	0,9	0	3,9	27,7	20,4	0	0	0	0	2,1	0	0,05
2710,982906	0	3,7	0	0	0	0	0	0	0	36,7	0	0,4	0	4,5	21,2	32,3	0	0	0	0	1,2	0	0,05
3401,051282	0	6,8	0	0	0	0	0	0	0	34,5	0,05	0,2	0	3,9	33,1	19,1	0	0	0	0	2,4	0	0,05
4436,153846	0	6,7	0	0	0	0	0	0	0	23	0,05	1,9	0	6,3	29,3	28,9	0	0	0	0	3,9	0	0,05
4978,350427	0	9,7	0	0	0	0	0	0	0	23,8	0,05	0,7	0	3,6	32,6	25,8	0,3	0	0	0	3,2	0,05	0,3
5767	0	9,3	0	0	0	0	0	0	0	18,5	0,05	1,6	0	1,9	26,2	39,7	0	0	0	0	2,2	0,05	0,6
6961,285714	0	7,5	0	0	0	0	0	0	0	25,4	0,4	2,2	0	1,9	14,9	45,5	0	0	0	0	2,2	0	0,05
8902	0	15,9	0	0	0	0	0	0	0	11,4	1	1,7	0	1,3	19,9	47,8	0	0	0	0	1	0	0,05
9677,886076	0	7,8	0	0	0	0	0	0	0	18,6	1,3	1,6	0	4,2	21,8	44,4	0	0	0	0	0,3	0	0,05
10397	0	18	0	0	0,05	0	0	0	0,6	17	0	3,2	0	5,5	10,3	45,4	0	0	0	0	0	0	0,05
11131,02083	0	8,2	0	0	0	0	0	0	0	7,9	0,3	2	0	20,8	10,6	50,2	0	0	0	0	0	0	0
11331,20833	0	9,1	0	0	0	0	0	0	0	6,7	0,05	2,7	0	41,7	9,8	30	0	0	0	0	0	0	0
11498,03125	0	12,4	0	0	0	0	0	0	0	3,5	0	1	0	48,5	5,9	28,7	0	0	0	0	0	0	0
11631,48958	0	24	0	0	0	0	0	0	0	5,6	0	1,6	0	34	5,6	29,2	0	0	0	0	0	0	0
11764,94792	0	3,4	0	0	0	0	0	0	0	1,5	0,05	0,9	0	70,5	6,2	16,9	0	0	0	0	0,6	0	0
11898,40625	0	2,6	0	0	0	0	0	0	0	7,3	0	1,3	0	59,5	7,7	21,6	0	0	0	0	0	0	0
12031,86458	0	11	0	0	0	0	0	0	0	4,55	0	0,6	0	51	9	23,9	0	0	0	0	0	0	0
12198,6875	0	11,8	0	0	0	0	0	0	0	8,1	0	1,4	0	42,4	6,6	29,7	0	0	0	0	0	0	0
12332,14583	0	3,5	0	0	0	0	0	0	0	1,4	0	0	0	78,6	2,7	13,8	0	0	0	0	0	0	0
12532,33333	0	0	0	0	0	0	0	0	0	0,85	0	0	0	96	3,2	0,05	0	0	0	0	0	0	0
12699,15625	0	0	0	0	0	0	0	0	0	0	0	0	0	95,8	2,8	1,4	0	0	0	0	0	0	0
12899,34375	0	0,05	0	0	0	0	0	0	0	0	0	0	0	99,3	0	0,7	0	0	0	0	0	0	0
13032,80208	0	0	0	0	0	0	0	0	0	0,5	0	0	0	96,5	0,5	2,5	0	0	0	0	0	0	0
13266,35417	0	0	0	0	0	0	0	0	0	0	0	0	0	98	0	2	0	0	0	0	0	0	0
13466,54167	0	2,6	0	0	0	0	0	0	0	1	0	0	0	83,7	1,6	11,1	0	0	0	0	0	0	0
13600	0	0,5	0	0	0	0	0	0	0	0	0	0	0	95,3	2,1	2,1	0	0	0	0	0	0	0
13766,82292	0	3,7	0	0	0	0	0	0	0	2,5	0	0	0	86,8	0,4	5,8	0	0	0	0	0,8	0	0
13967,01042	0	2,1	0	0	0	0	0	0	0	2,6	0	0	0	90,6	1,3	3,4	0	0	0	0	0	0	0
14100,46875	0	3,5	0	0	0	0	0	0	0	0,55	0	0	0	90,1	0,5	5,4	0	0	0	0	0	0	0
14300,65625	0	5,2	0	0	0	0	0	0	0	3,7	0	0	0	74	1,5	15,6	0	0	0	0	0	0	0

## Sheet: 36 R taxa in 37 samples
cal age, years	Acrosphaera spinosa	Amphimelissa setosa	Artostrobus borealis	Artostrobium eupora	Artostrobium tumidulum	Artostrobus annulatus	Artostrobus joergensenii	Axoprunum stauraxonium	Cenosphaera favosa	Cornutella profunda	Actinomma boreale/A. leptodermuagroup	Cycladophora davisiana	Eucecryphalus craspedota	Eucyrtidium acuminatum	Hymeniastrum euclidis	Lamprocyclas maritalis	Lithelius spiralis/minor group	Lithocampe platycephala	Lithomelissa setosa	Lithomelissa thoracites	Lithomitra arachnea	Lithomitra lineata	Phorticium clevei	Pseudodictyophimus gracilipes group	Rhizoplegma boreale	Rhizosphaera medianum	Spongocore puella	Spongopyle osculosa	Spongodiscus resurgens	Spongotrochus glacialis	Stylatractus pyriformis	Stylochlamidium venustum	Stylodictya validispina	Theocorythium trachelium dianae	Tetrapyle quadriloba group	Tricolocapsa papilloosa mediterreanea
0	0	0	0	0	8,664259928	0	0	0	0	0	2,888086643	0,36101083	1,083032491	0,722021661	0,36101083	0	30,32490975	0	4,693140794	0	1,805054152	0	6,859205776	2,888086643	0	0	0,722021661	8,303249097	0	1,083032491	1,083032491	5,776173285	5,776173285	1,083032491	0	0
197,1623932	0	0,694444444	0,694444444	0	8,333333333	0	0,694444444	0	0	0,347222222	2,430555556	0,694444444	1,041666667	0	0	0	22,56944444	1,388888889	6,597222222	0	2,083333333	1,736111111	7,638888889	6,944444444	0	0	0	6,944444444	0	0,347222222	0,347222222	1,736111111	5,902777778	0,347222222	0	0
394,3247863	0	0	0	0	6,12244898	0,29154519	0	0	0	0,874635569	2,915451895	0,583090379	0,583090379	0	0	0	21,86588921	0,29154519	8,163265306	0,583090379	1,457725948	0,874635569	10,49562682	6,413994169	0	0	0	5,539358601	0	0,583090379	1,749271137	4,373177843	6,413994169	0,29154519	0	0
542,1965812	0	0	0,280112045	0	3,081232493	0	0	0	0	0,840336134	5,602240896	0,840336134	0	0	0	0	21,8487395	0	7,00280112	0,280112045	1,120448179	0,56022409	5,882352941	8,683473389	0	0	0,280112045	3,641456583	0	0,56022409	1,960784314	3,921568627	4,761904762	0,280112045	0	0
739,3589744	0	0	1,079136691	0	7,194244604	0,35971223	1,079136691	0	0	0,35971223	6,834532374	0,35971223	0,71942446	0	0	0	19,42446043	1,438848921	13,66906475	0	3,956834532	2,517985612	3,237410072	3,956834532	0	0	0,71942446	3,237410072	0	0,71942446	1,438848921	2,877697842	4,676258993	0,35971223	0	0
1035,102564	0	0	0,940438871	0	3,448275862	0,313479624	0,626959248	0	0	0,313479624	5,015673981	0,626959248	0,940438871	0	0	0	19,7492163	1,253918495	10,34482759	0,313479624	2,194357367	1,567398119	6,269592476	5,015673981	0	0	0	3,761755486	0	0,313479624	0,940438871	6,5830721	5,015673981	0,313479624	0	0
1281,555556	0	0	0	0,337837838	4,054054054	0	0	0	0	0	4,72972973	0,337837838	0	0	0	0	22,2972973	0,337837838	7,432432432	0	1,351351351	2,027027027	6,418918919	7,094594595	0	0	0	2,702702703	0	0	1,689189189	7,432432432	6,081081081	0,337837838	0	0
1873,042735	0	0	0	0,716845878	0,716845878	0	0,358422939	0	0	0,716845878	0	0	1,075268817	0,358422939	0	0	22,22222222	1,075268817	6,810035842	0	0	1,792114695	10,39426523	6,810035842	0	0	0	7,52688172	0	0	0	3,584229391	6,093189964	1,075268817	0	0
2710,982906	0	0	0,597014925	0	0,597014925	0	0,298507463	0	0	0	2,985074627	0,298507463	0,298507463	0,298507463	0	0	18,20895522	0,298507463	8,656716418	0,597014925	1,492537313	0,895522388	8,358208955	7,76119403	0	0	0,597014925	5,074626866	0	0,597014925	2,985074627	5,373134328	2,388059701	0,597014925	0	0,298507463
3401,051282	0	0	0,549450549	0	0,549450549	0	0,274725275	0	0	0,824175824	3,846153846	1,923076923	1,923076923	0,274725275	0,274725275	0	18,40659341	0,274725275	7,417582418	0,274725275	3,021978022	2,747252747	7,417582418	8,516483516	0	0	0,274725275	3,846153846	0	0,824175824	1,373626374	0,549450549	9,340659341	0	0	0,274725275
4436,153846	0	0	0,505050505	0	0	0	1,01010101	0	0	0	5,050505051	0,505050505	0	1,01010101	0	0	25,25252525	0	5,050505051	0	4,04040404	0	9,090909091	4,04040404	0	0	0,505050505	7,070707071	0	0,505050505	1,01010101	5,555555556	9,595959596	0,505050505	0	1,515151515
4978,350427	0	0	0,35335689	0	0,35335689	0,35335689	0	0,35335689	0	0,706713781	4,946996466	1,060070671	0,35335689	0,35335689	0	0	23,67491166	0	7,067137809	1,060070671	1,766784452	1,413427562	7,4204947	6,713780919	0	0	0,35335689	4,240282686	0	0,35335689	0,706713781	4,593639576	10,9540636	0	0	0
5767	0	0	0,395256917	0,395256917	0,395256917	0	1,185770751	0	0	0	5,138339921	2,371541502	0	0	0	0	18,97233202	0	5,928853755	1,185770751	1,185770751	2,371541502	10,27667984	4,743083004	0	0	0,790513834	2,766798419	0	0	0,790513834	5,928853755	9,090909091	1,581027668	0	0
6961,285714	0	0	0	0,547945205	0	0,547945205	0,547945205	0	0	0,821917808	6,575342466	0	0	0	0	0,273972603	13,15068493	0,273972603	6,301369863	0	1,095890411	3,835616438	8,767123288	5,205479452	0	0	0,273972603	3,287671233	0	0,547945205	0,273972603	6,02739726	17,26027397	0,547945205	0	0,821917808
8902	0	1,10701107	0,36900369	0,73800738	0	0,36900369	2,58302583	0	0,36900369	0,36900369	9,963099631	0,73800738	0	0	0,36900369	0	12,91512915	1,10701107	8,118081181	0,36900369	4,79704797	4,42804428	4,05904059	6,642066421	0	0	0	2,21402214	0	0	0	6,642066421	5,535055351	0	0	0
9677,886076	0	0,701754386	1,052631579	1,052631579	0	0,350877193	0	0	0	0,701754386	7,01754386	0,701754386	0	0	0	0	12,98245614	3,157894737	12,98245614	1,052631579	1,403508772	1,754385965	3,859649123	5,614035088	0	0	0,350877193	1,052631579	0	1,052631579	0,701754386	7,01754386	10,87719298	0	0	0
10397	0	0,628930818	0,314465409	0	0,628930818	0,314465409	0,943396226	0	0	1,257861635	16,66666667	0,314465409	0	0	0	0	9,433962264	1,572327044	7,547169811	0,628930818	1,257861635	0,314465409	8,805031447	9,748427673	0	0	0	2,51572327	0	0,628930818	2,51572327	1,257861635	4,088050314	0	0	0
11131,02083	0	2,076124567	0	0	0,692041522	0	0,692041522	0	0	0	13,49480969	1,038062284	0	0	0	0	14,53287197	1,384083045	5,882352941	0,346020761	3,114186851	1,038062284	6,574394464	6,574394464	0	0	0	4,152249135	0,346020761	0	2,076124567	0,346020761	4,498269896	0,346020761	0	0
11331,20833	0	0,262467192	0	0,524934383	0	0	1,57480315	0,262467192	0	0,524934383	20,20997375	1,049868766	0	0	0	0	12,07349081	2,624671916	4,724409449	1,312335958	5,511811024	1,049868766	8,13648294	9,186351706	0	0	0	1,312335958	0	0,524934383	3,674540682	0,262467192	3,149606299	0,262467192	0	0,262467192
11498,03125	0	2,614379085	0	0,653594771	0	0	0,653594771	0	0	0,980392157	15,68627451	1,633986928	0	0	0	0	10,13071895	1,960784314	7,843137255	0,980392157	6,209150327	1,633986928	6,535947712	8,169934641	0	0	0,326797386	0,980392157	0,653594771	0,326797386	2,614379085	0	2,941176471	0,326797386	0	0,326797386
11631,48958	0	0	0	0	0	0	0,409836066	0	0	1,229508197	12,70491803	2,049180328	0	0	0	0	8,606557377	4,508196721	6,147540984	1,639344262	7,37704918	4,508196721	4,918032787	11,8852459	0	0	0	4,098360656	0	0	2,459016393	0,409836066	6,147540984	0	0	0
11764,94792	0	1,910828025	0	0	0	0	0,636942675	0	0	0,955414013	12,42038217	1,910828025	0	0	0	0	13,05732484	2,547770701	7,643312102	1,910828025	6,050955414	7,961783439	4,458598726	6,050955414	0	0	0	1,592356688	0	0,318471338	0,955414013	0,955414013	3,821656051	0	0	0
11898,40625	0	0	0	0	0	0	0	0	0	0,607902736	16,41337386	2,127659574	0	0	0	0	7,902735562	1,519756839	5,47112462	1,215805471	18,8449848	6,079027356	6,990881459	4,255319149	0	0	0	1,215805471	0	0,303951368	1,823708207	0	2,431610942	0	0	0
12031,86458	0	2,134146341	0	0	0	0	0	0	0	0	12,5	2,134146341	0	0	0	0	8,231707317	1,829268293	4,268292683	0	25	4,87804878	9,146341463	2,134146341	0	0	0	2,134146341	0	0,609756098	1,524390244	0,609756098	0,914634146	0	0	0
12198,6875	0	2,352941176	0	0	0	0	0,392156863	0	0	0	15,29411765	6,274509804	0	0	0	0	5,098039216	1,176470588	7,058823529	0,392156863	30,58823529	0,392156863	3,529411765	2,352941176	0	0	0	1,176470588	0	0,392156863	4,31372549	0	2,745098039	0	0	0
12332,14583	0	5,988023952	0	0	0	0,299401198	0	0	0	0,299401198	28,44311377	5,988023952	0	0	0	0	5,988023952	0,898203593	2,694610778	0	15,86826347	0,299401198	5,988023952	1,796407186	0	0	0	1,19760479	0	0,299401198	2,095808383	0,598802395	1,497005988	0	0	0
12532,33333	0	36,57587549	0	0	0	0,389105058	1,556420233	0	0	0,389105058	14,78599222	7,003891051	0	0	0	0	4,280155642	0,778210117	0,389105058	0	4,280155642	0,389105058	1,167315175	3,501945525	0	0	0	0,389105058	0	1,167315175	2,723735409	0,389105058	0,389105058	0	0	0
12699,15625	0	31,53153153	0	0	0	0	0	0	0	1,351351351	19,36936937	5,405405405	0	0	0	0	5,405405405	0,900900901	0	0	4,504504505	0	0,900900901	10,81081081	0	0	0	0,900900901	0	0	2,702702703	0	0,45045045	0	0	0
12899,34375	0	30,51643192	0	0	0	0	2,816901408	0	0	0,938967136	19,24882629	9,389671362	0	0	0	0	4,225352113	0,938967136	0	0	5,633802817	0	0	7,042253521	0	0	0	0,938967136	0	1,408450704	2,34741784	0	0,469483568	0	0	0
13032,80208	0	32,64604811	0	0	0	0,687285223	0,687285223	0	0	0,343642612	17,5257732	7,560137457	0	0	0	0	6,18556701	0,687285223	0	0	9,965635739	0,687285223	3,436426117	5,154639175	0	0	0	1,718213058	0	1,374570447	1,718213058	0	0,343642612	0	0	0,343642612
13266,35417	0	17,58241758	0	0	0	0	0	0	0	0	21,61172161	2,93040293	0	0	0	0	10,98901099	0,732600733	0	0	6,95970696	0,732600733	12,45421245	2,93040293	0	0	0	4,761904762	0	7,326007326	0,366300366	0	1,465201465	0	0	0
13466,54167	0	0,340136054	0	0	0	0	0,340136054	0	0	0,340136054	10,20408163	1,700680272	0	0	0	0	12,58503401	0,340136054	0,340136054	0	5,782312925	1,360544218	42,85714286	0,340136054	0	0	0	7,823129252	0	4,761904762	0	0,340136054	1,700680272	0	0	0
13600	0	2,180685358	0	0	0	0	1,557632399	0	0	0	9,034267913	3,426791277	0	0	0	0	14,01869159	0,31152648	0	0	11,21495327	2,492211838	28,97196262	2,180685358	0	0	0	2,492211838	0	11,52647975	0	0	1,246105919	0	0	0
13766,82292	0	0	0	0	0	0	0,920245399	0	0	0	8,895705521	3,680981595	0	0	0	0	12,57668712	0	0,306748466	0	3,374233129	1,840490798	36,50306748	1,840490798	0	0	0	7,36196319	0	8,588957055	0,306748466	0,306748466	3,067484663	0	0	0
13967,01042	0	2,44648318	0	0	0	0	0,917431193	0	0	0	7,951070336	2,44648318	0	0	0	0	14,06727829	0,305810398	0,305810398	0,305810398	15,59633028	2,752293578	17,43119266	6,116207951	0	0	0	1,22324159	0	10,39755352	0	0,917431193	3,363914373	0	0	0
14100,46875	0	5,128205128	0	0	0	0,512820513	0	0	0	0	8,205128205	7,179487179	0	0	0	0	10,76923077	0	0,512820513	0	14,35897436	2,564102564	8,205128205	7,179487179	0	0	0	10,25641026	0	8,205128205	0	0	2,564102564	0	0	0
14300,65625	0	1,990049751	0	0	0,995024876	0	0,995024876	0	0	0	12,43781095	9,950248756	0	0	0	0	24,37810945	0	0,497512438	0	9,950248756	1,990049751	4,47761194	2,487562189	0	0	0	7,960199005	0	5,472636816	0,497512438	0	1,990049751	0	0	0
* Part of this dataset was presented in [48] but without an age assignment and with a different list of species.

## Sheet: 25 BF taxa in 37 samples
cal age, years	Cribrostomoides sp	Eggerella bradyi	Karreriella baccata	Sigmoilopsis shlumbergeri	Pyrgo spp/ Triloculina	Lagena spp	Oolina spp / Fissurina spp	Cibicides wuellerstorfi	Cibicides lobatulus	Cibicides spp	Elphidium spp	Melonis barleeanus	Nonionella spp	Epistominella exigua	Alabaminella weddellensis	Pullenia bulloides	Oridorsalis tener	Bolivina subspinescens	Uvigerina peregrina	Bulimina mexicana	Trifarina angulosa	Cassidulina reniforme	Cassidulina teretis	Islandiella norcrossi	Globocassidulina subglobosa
0	0	0	0	0	0	0	0	0	0	0	0	0	0	0	0	0	0	0	0	0	0	0	0	0	0
197,1623932	2,752293578	4,587155963	1,834862385	7,339449541	0,917431193	3,669724771	2,752293578	0,917431193	1,834862385	1,834862385	0,917431193	0,917431193	1,834862385	5,504587156	1,834862385	5,504587156	2,752293578	0,917431193	4,587155963	19,26605505	2,752293578	2,752293578	11,9266055	0,917431193	9,174311927
394,3247863	2,02020202	2,02020202	1,01010101	3,03030303	0	3,03030303	4,04040404	4,04040404	0	1,01010101	1,01010101	2,02020202	1,01010101	13,13131313	1,01010101	0	9,090909091	0	1,01010101	10,1010101	1,01010101	1,01010101	23,23232323	5,050505051	11,11111111
542,1965812	0,99009901	5,940594059	0	5,940594059	0,99009901	1,98019802	0,99009901	5,940594059	0	3,465346535	2,475247525	1,485148515	2,97029703	6,435643564	0	4,455445545	7,425742574	0,99009901	1,98019802	15,84158416	3,465346535	0,99009901	16,33663366	2,97029703	5,940594059
739,3589744	0,925925926	1,851851852	0,925925926	2,777777778	0	7,407407407	2,777777778	1,851851852	0	0,925925926	0	0	0	7,407407407	0	4,62962963	7,407407407	1,851851852	3,703703704	13,88888889	1,851851852	0,925925926	18,51851852	4,62962963	15,74074074
1035,102564	0	2,857142857	0	5,714285714	4,761904762	0,952380952	1,904761905	0,952380952	0,952380952	0,952380952	0	0	0,952380952	17,14285714	0	1,904761905	8,571428571	0,952380952	0,952380952	7,619047619	0,952380952	0	18,0952381	1,904761905	21,9047619
1281,555556	0	0	0	0	0	0	0	0	0	0	0	0	0	0	0	0	0	0	0	0	0	0	0	0	0
1873,042735	0	0	0	0	0	0	0	0	0	0	0	0	0	0	0	0	0	0	0	0	0	0	0	0	0
2710,982906	0	2,702702703	0	3,603603604	0	0,900900901	2,702702703	0	0,900900901	0,900900901	0	7,207207207	5,405405405	7,207207207	0	1,801801802	7,207207207	1,801801802	0	16,21621622	6,306306306	0	22,52252252	0,900900901	11,71171171
3401,051282	0	6,310679612	0	2,912621359	0,970873786	7,281553398	3,883495146	0,970873786	0	0,485436893	0,485436893	0,485436893	3,398058252	3,398058252	0	1,45631068	6,310679612	0,970873786	4,368932039	20,38834951	2,912621359	0,485436893	21,84466019	0	10,67961165
4436,153846	0	5,988023952	0	0	0	2,395209581	1,19760479	0	0	2,395209581	0	0	1,19760479	2,395209581	0	3,592814371	13,17365269	1,19760479	5,988023952	25,4491018	5,688622754	0	23,65269461	0,598802395	5,089820359
4978,350427	0	1,449275362	2,898550725	0,966183575	1,93236715	1,449275362	2,415458937	1,449275362	0	0,966183575	0	0	1,93236715	3,8647343	0	0,966183575	9,661835749	0	4,830917874	30,43478261	0	0,483091787	25,12077295	0,483091787	8,695652174
5767	0	0	3,504043127	0	2,964959569	1,617250674	5,39083558	0,808625337	0	3,773584906	0	0	0,539083558	18,86792453	0	0,808625337	9,703504043	0,808625337	0,539083558	11,85983827	2,964959569	0	22,64150943	0	13,20754717
6961,285714	0	0,714285714	1,071428571	1,428571429	3,928571429	3,928571429	2,142857143	0	0	2,142857143	0	0	0	13,92857143	0	0,714285714	7,5	0	0	26,42857143	0,714285714	0,714285714	26,78571429	0	7,857142857
8902	0	0	4,615384615	1,025641026	5,641025641	0	1,025641026	0	0	3,58974359	0	0,512820513	0	2,051282051	0	1,538461538	0	0	0	40,51282051	5,641025641	1,025641026	26,66666667	0	6,153846154
9677,886076	0	1,204819277	0	2,409638554	0	2,409638554	4,819277108	1,204819277	0	0	0	0	14,45783133	16,86746988	0	2,409638554	1,204819277	0	0	16,86746988	3,614457831	0	24,09638554	0	8,43373494
10397	0	0	0	0	0	0	0	0	0	0	0	0	0	0	0	0	0	0	0	0	0	0	0	0	0
11131,02083	0	0	0	0	0	0	0	0	0	0	0	0	0	0	0	0	0	0	0	0	0	0	0	0	0
11331,20833	0	0	0	0	0	0	0	0	0	0	0	0	0	0	0	0	0	0	0	0	0	0	0	0	0
11498,03125	0	7,692307692	3,846153846	0	0	1,923076923	15,38461538	0	7,692307692	0	0	5,769230769	5,769230769	11,53846154	9,615384615	0	0	11,53846154	0	1,923076923	3,846153846	0	5,769230769	5,769230769	1,923076923
11631,48958	0	7,407407407	9,87654321	0	2,469135802	2,469135802	9,87654321	7,407407407	0	7,407407407	2,469135802	7,407407407	0	0	4,938271605	1,234567901	0	3,703703704	0	1,234567901	14,81481481	0	16,04938272	1,234567901	0
11764,94792	0	3,539823009	0	6,194690265	1,769911504	0,884955752	7,079646018	2,654867257	4,424778761	0,884955752	1,769911504	5,309734513	0,884955752	4,424778761	0	3,539823009	5,309734513	2,654867257	0	36,28318584	1,769911504	0	5,309734513	5,309734513	0
11898,40625	0	7,547169811	0	15,09433962	0	0	3,773584906	0	11,32075472	0	1,886792453	5,660377358	0	1,886792453	5,660377358	0	0	5,660377358	0	18,86792453	5,660377358	1,886792453	3,773584906	9,433962264	1,886792453
12031,86458	0	27,27272727	0	4,545454545	6,060606061	3,03030303	7,575757576	1,515151515	7,575757576	0	0	12,12121212	1,515151515	0	0	1,515151515	3,03030303	4,545454545	0	10,60606061	0	1,515151515	6,060606061	1,515151515	0
12198,6875	0	0	0	0	0	0	0	0	0	0	0	0	0	0	0	0	0	0	0	0	0	0	0	0	0
12332,14583	0	0	0	0	0	0	0	0	0	0	0	0	0	0	0	0	0	0	0	0	0	0	0	0	0
12532,33333	0	0	0	0	0	0	0	0	0	0	0	0	0	0	0	0	0	0	0	0	0	0	0	0	0
12699,15625	0	0	0	0	0	0	0	0	0	0	0	0	0	0	0	0	0	0	0	0	0	0	0	0	0
12899,34375	0	0	0	0	0	0	0	0	0	0	0	0	0	0	0	0	0	0	0	0	0	0	0	0	0
13032,80208	0	6,896551724	12,06896552	1,724137931	1,724137931	10,34482759	0	12,06896552	15,51724138	0	0	0	1,724137931	1,724137931	5,172413793	13,79310345	0	3,448275862	0	1,724137931	0	6,896551724	5,172413793	0	0
13266,35417	0	0	0	1,587301587	0	0	9,523809524	1,587301587	7,936507937	0	0	9,523809524	3,174603175	1,587301587	0	55,55555556	0	0	0	6,349206349	0	0	1,587301587	3,174603175	0
13466,54167	0,819672131	4,098360656	31,14754098	0	9,016393443	7,37704918	13,1147541	0,819672131	2,459016393	2,459016393	0	0	0,819672131	1,639344262	4,918032787	4,918032787	0,819672131	0,819672131	0	6,557377049	0	0	13,1147541	0,819672131	0
13600	0	7,407407407	0	1,851851852	11,11111111	12,96296296	1,851851852	5,555555556	7,407407407	0	0	0	1,851851852	3,703703704	1,851851852	3,703703704	1,851851852	1,851851852	0	9,259259259	0	0	22,22222222	5,555555556	0
13766,82292	0	17,07317073	7,317073171	9,756097561	0	2,43902439	2,43902439	0	4,87804878	4,87804878	0	0	0	0	0	17,07317073	4,87804878	0	0	24,3902439	0	0	4,87804878	0	0
13967,01042	0	2,884615385	0	9,615384615	0	7,692307692	8,653846154	0	2,884615385	0	0,961538462	0	2,884615385	0,961538462	0,961538462	24,03846154	2,884615385	0	0	23,07692308	0	3,846153846	6,730769231	1,923076923	0
14100,46875	0	2,666666667	0	1,333333333	1,333333333	4	9,333333333	4	2,666666667	1,333333333	0	1,333333333	1,333333333	1,333333333	0	40	2,666666667	0	0	20	0	0	6,666666667	0	0
14300,65625	0	8,955223881	1,492537313	14,92537313	4,47761194	1,492537313	4,47761194	5,970149254	0	0	0	0	0	0	0	19,40298507	2,985074627	0	0	11,94029851	2,985074627	1,492537313	17,91044776	1,492537313	0
